# Supplementary material for: A new potential biomarker for 1-testosterone misuse in human urine by liquid chromatography quadruple time-of-flight mass spectrometry
Source: Royal Society of Chemistry journal article supplement (doi:10.1039/c5ay00658a), 2015-01-01

Fig. S1 The targeted MS/MS spectrum of **M1** at CE of 30 eV in positive ion mode

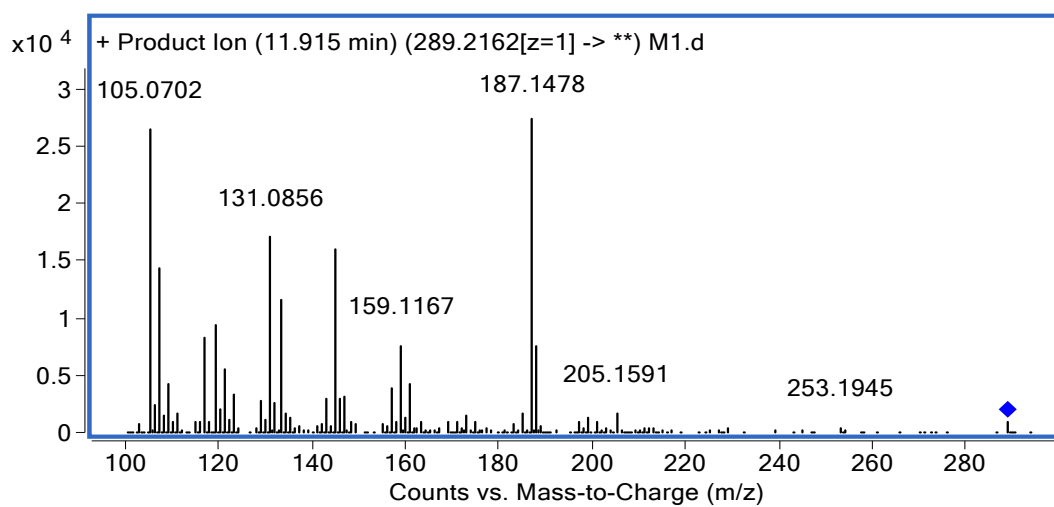

Fig. S2 The targeted MS/MS spectrum of **M2** at CE of 30 eV in positive ion mode

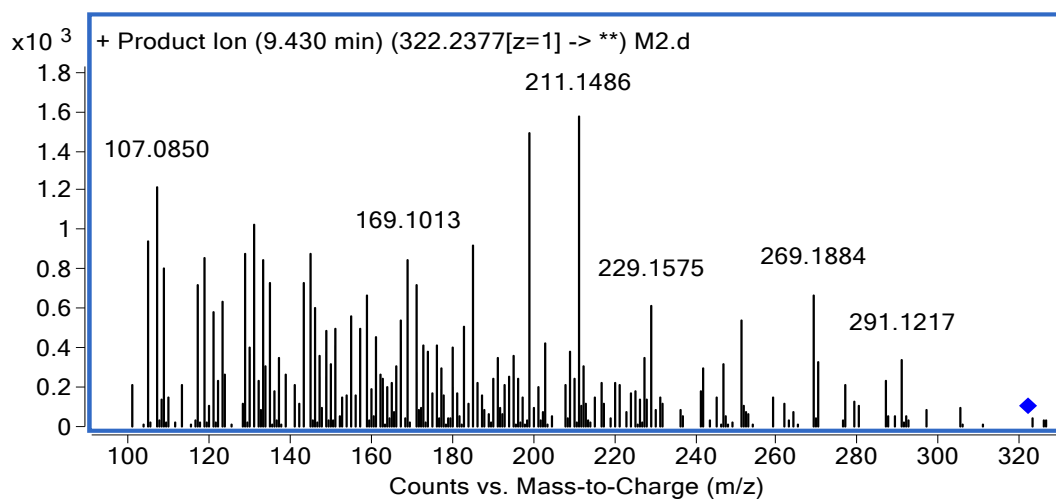

Fig. S3 The targeted MS/MS spectrum of **M3** at CE of 30 eV in positive ion mode

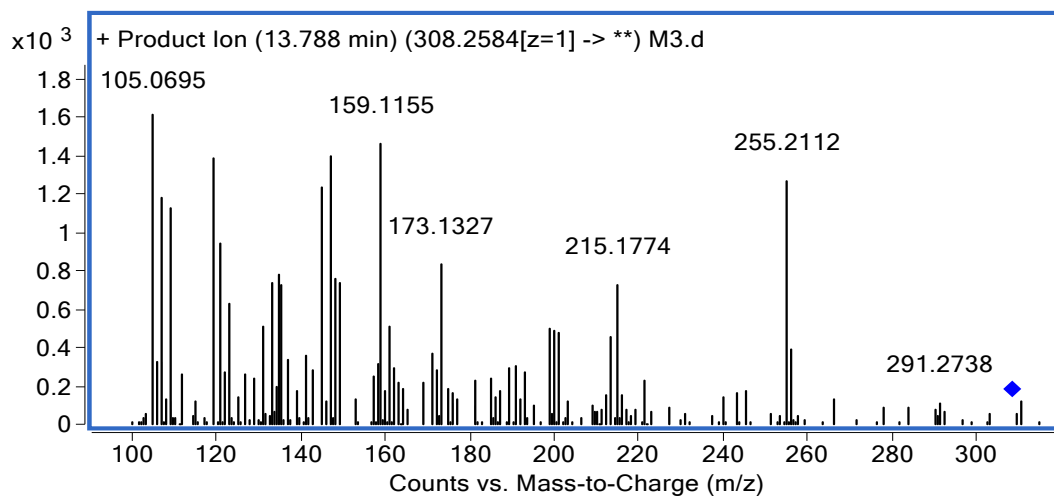

Fig. S4 The targeted MS/MS spectrum of **M4** at CE of 30 eV in positive ion mode

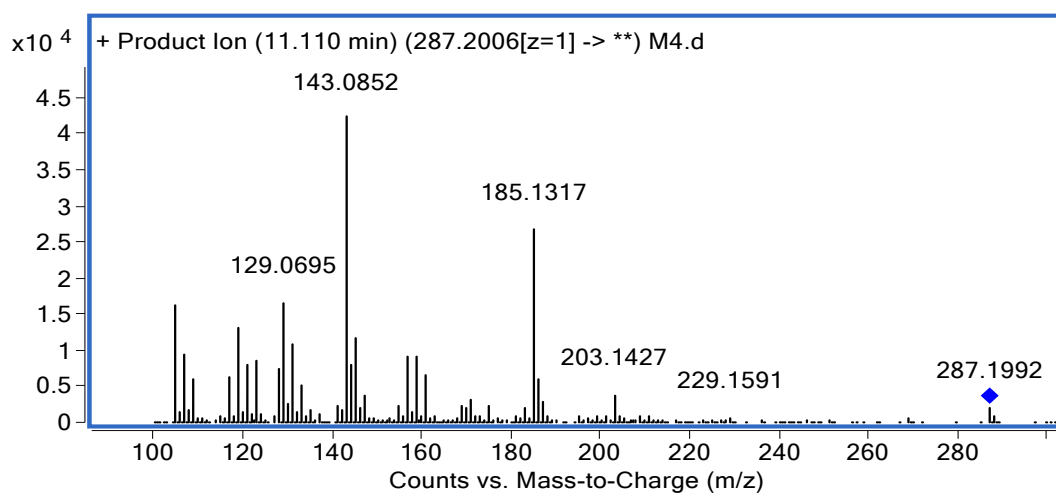

Fig. S5 The extraction ion chromatogram of **S1** in negative ion mode

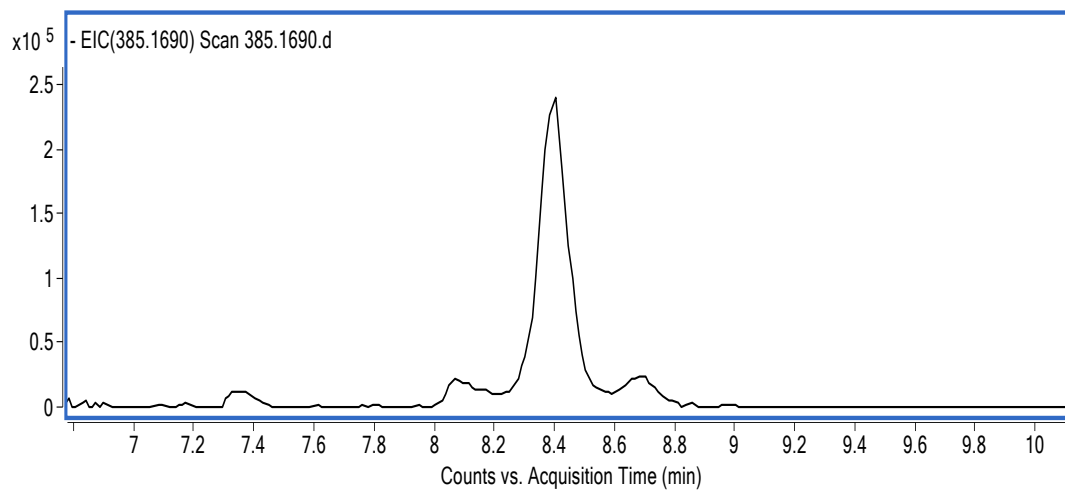

Fig. S6 The extraction ion chromatogram of **M1** in positive ion mode

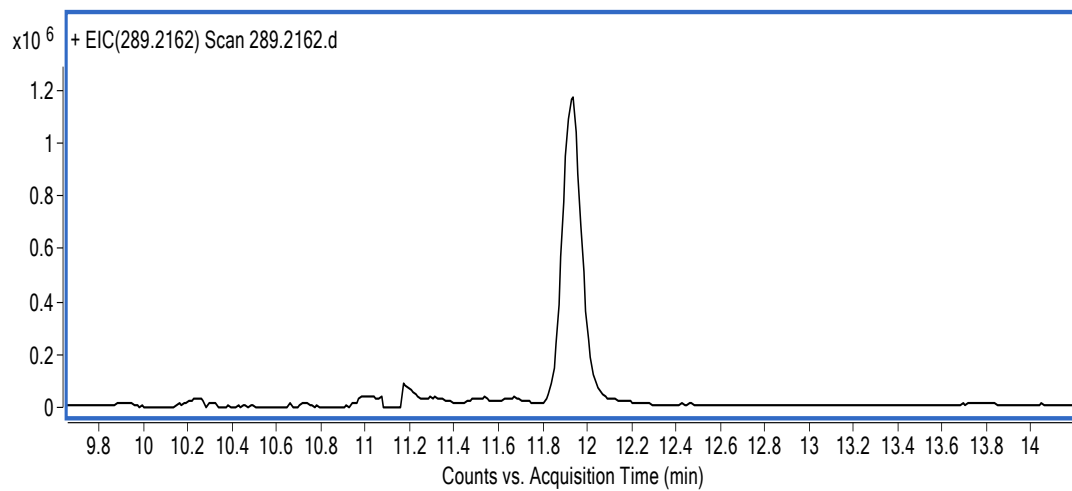

Fig. S7 The extraction ion chromatogram of **M2** in positive ion mode

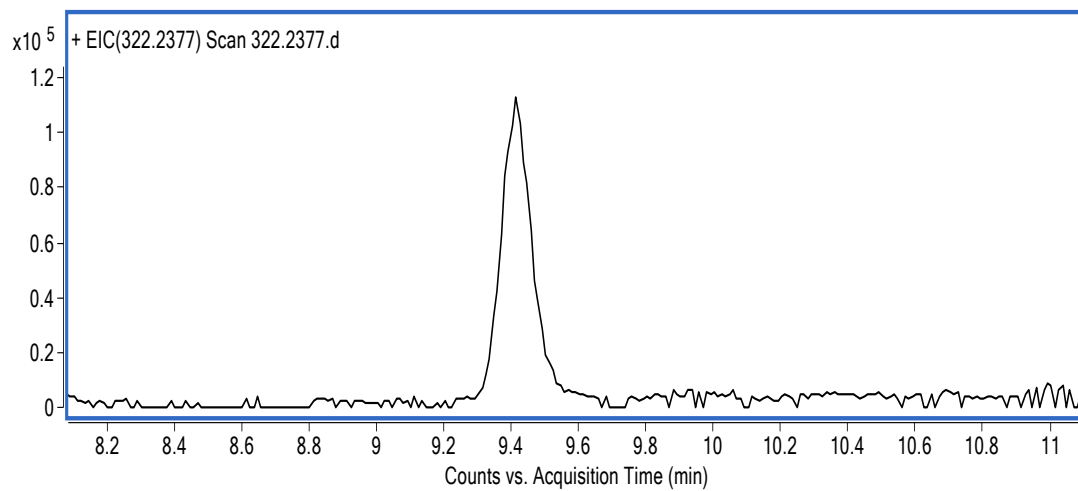

Fig. S8 The extraction ion chromatogram of **M3** in positive ion mode

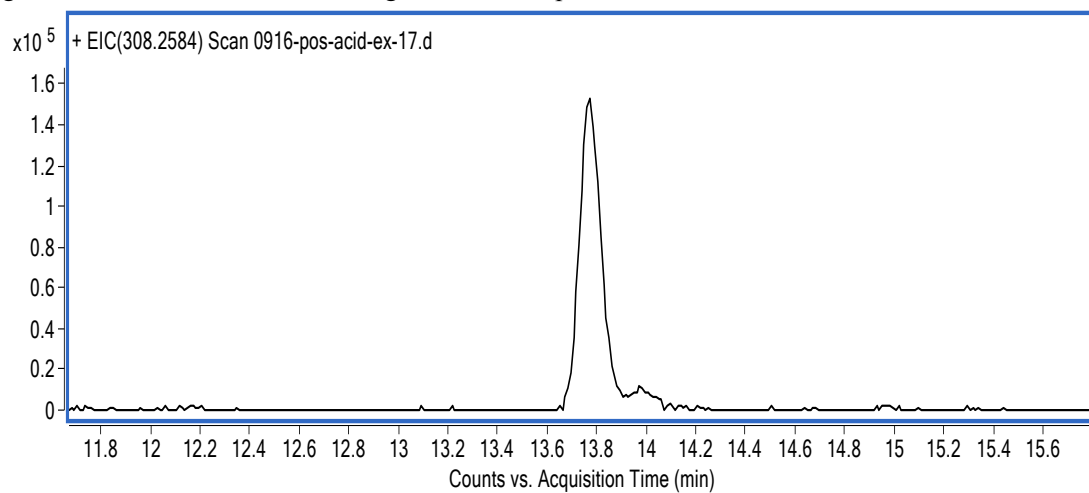



Fig. S9 The extraction ion chromatogram of **M4** in positive ion mode

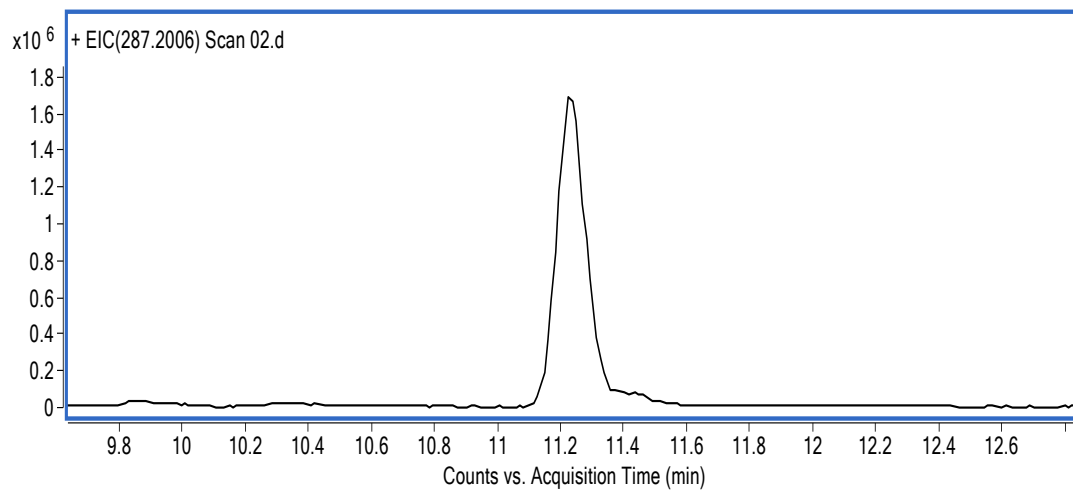

Fig. S10 Electron ionization mass spectrum of bis-O-TMS derivative of **M1**

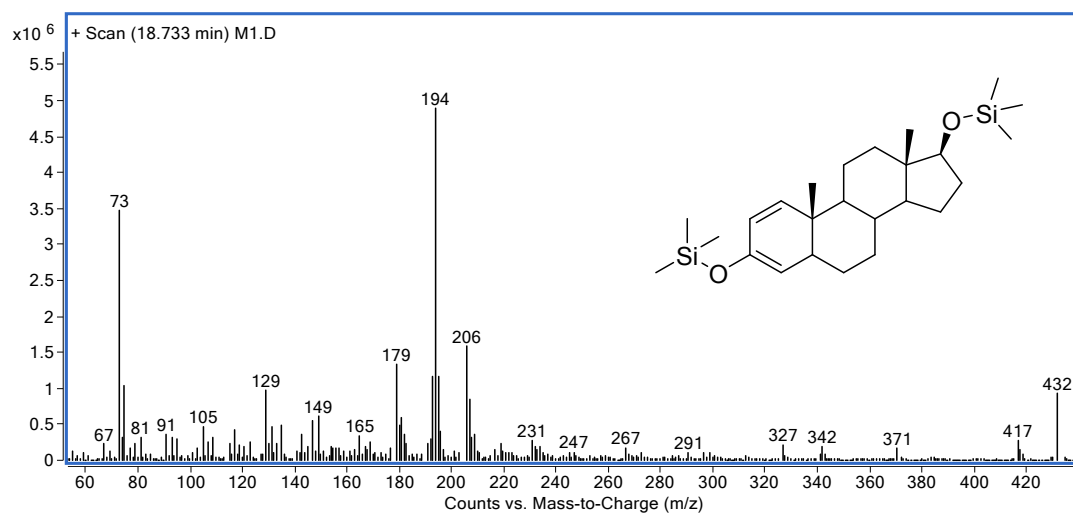

Fig. S11 Electron ionization mass spectrum of bis-O-TMS derivative of **M2**

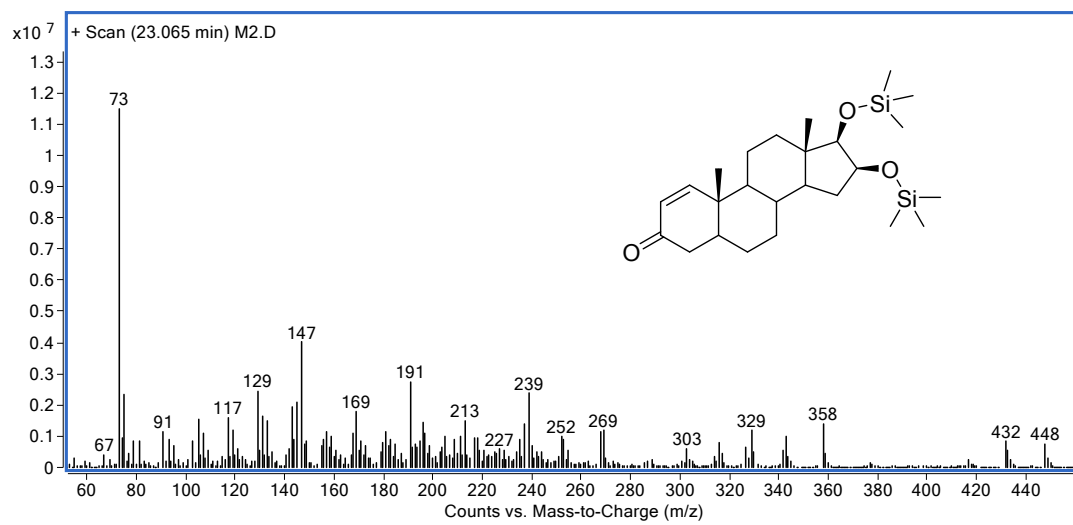

Fig. S12 Electron ionization mass spectrum of bis-O-TMS derivative of **M3**

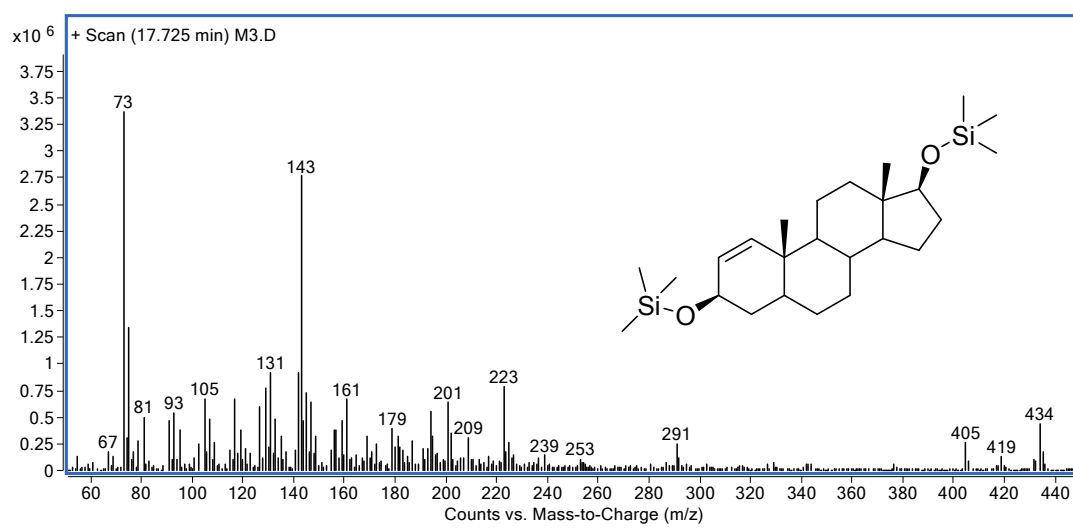

Fig. S13 Electron ionization mass spectrum of bis-O-TMS derivative of **M4**

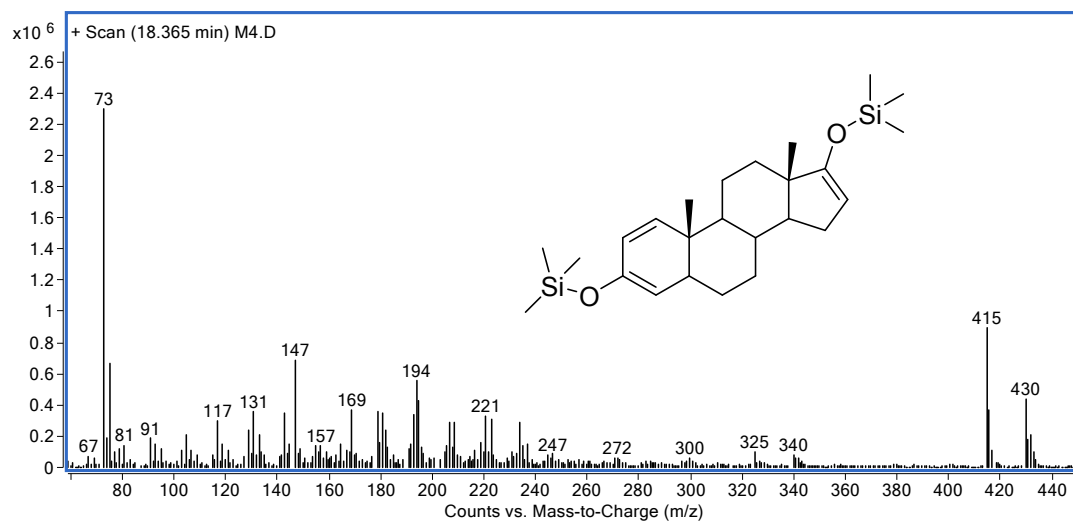

Supplement: c5ay00658a1.pdf [file c5ay00658a1.pdf]
